# Supplementary material for: Strain Rate Changes during Stress Echocardiography Are the Most Accurate Predictors of Significant Coronary Artery Disease in Patients with Previously Treated Acute Coronary Syndrome
Source: MDPI journal article supplement (doi:10.3390/diagnostics13101796), 2023-05-19
Supplement: s1 [file s1]

## Supplementary Data

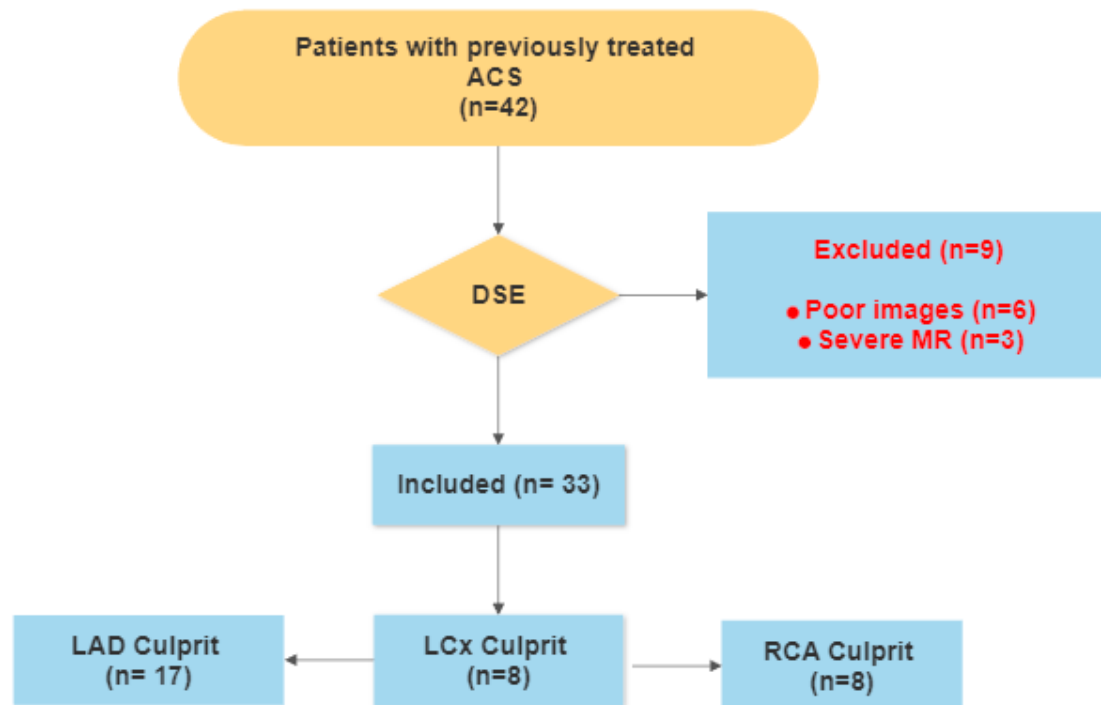

**Figure S1.** Patients' Flow chart

**Table S1.** Baseline and stress echocardiographic indices

| Variable                                  |         | Patients with<br>suspected CAD<br>(n=33) |
|-------------------------------------------|---------|------------------------------------------|
| <b><i>LV systolic function</i></b>        |         |                                          |
| LV EF (%)                                 | Rest    | 36.2 ± 8.9                               |
|                                           | Stress  | 42.2 ± 11                                |
|                                           | Delta   | -6.03 ± 4.2                              |
|                                           | P value | <0.001                                   |
| Global PSS                                | Rest    | -10.4 ± 2.6                              |
|                                           | Stress  | -12.2 ± 2.7                              |
|                                           | Delta   | -1.81 ± 0.9                              |
|                                           | P value | <0.001                                   |
| Global SR                                 | Rest    | -0.55 ± 0.2                              |
|                                           | Stress  | -0.78 ± 0.3                              |
|                                           | Delta   | -0.23 ± 0.6                              |
|                                           | P value | 0.01                                     |
| <b><i>Territories supplied by LAD</i></b> |         |                                          |
| Longitudinal PSS                          | Rest    | -9.85 ± 2.8                              |
|                                           | Stress  | -11.1 ± 3.5                              |
|                                           | Delta   | -1.37 ± 1.5                              |
|                                           | P value | <0.001                                   |
| Strain rate                               | Rest    | -0.56 ± 0.3                              |
|                                           | Stress  | -0.69 ± 0.4                              |
|                                           | Delta   | -0.13 ± 0.4                              |
|                                           | P value | 0.03                                     |
| <b><i>Territories supplied by LCx</i></b> |         |                                          |
| Longitudinal PSS                          | Rest    | -10.8 ± 2.9                              |
|                                           | Stress  | -12.8 ± 3.1                              |
|                                           | Delta   | -1.83 ± 1.1                              |
|                                           | P value | <0.001                                   |
| Strain rate                               | Rest    | -0.51 ± 0.2                              |
|                                           | Stress  | -0.79 ± 0.3                              |
|                                           | Delta   | -0.28 ± 0.2                              |
|                                           | P value | <0.001                                   |
| <b><i>Territories supplied by RCA</i></b> |         |                                          |
| Longitudinal PSS                          | Rest    | -10.7 ± 3.1                              |
|                                           | Stress  | -12.5 ± 3.1                              |
|                                           | Delta   | -1.65 ± 1.2                              |
|                                           | P value | <0.001                                   |
| Strain rate                               | Rest    | -0.54 ± 0.3                              |
|                                           | Stress  | -0.78 ± 0.3                              |
|                                           | Delta   | -0.24 ± 0.4                              |
|                                           | P value | <0.001                                   |

|                         |         |            |
|-------------------------|---------|------------|
| Global WMSI             | Rest    | 2.07 ± 0.5 |
|                         | Stress  | 1.85 ± 0.5 |
|                         | Delta   | 0.22 ± 0.2 |
|                         | P value | 0.01       |
| WMSI supplied<br>by LAD | Rest    | 2.24 ± 0.6 |
|                         | Stress  | 1.97 ± 0.7 |
|                         | Delta   | 0.27 ± 0.3 |
|                         | P value | 0.001      |
| WMSI supplied<br>by LCx | Rest    | 1.69 ± 0.5 |
|                         | Stress  | 1.49 ± 0.4 |
|                         | Delta   | 0.20 ± 0.4 |
|                         | P value | 0.01       |
| WMSI supplied<br>by RCA | Rest    | 2.27 ± 0.9 |
|                         | Stress  | 2.09 ± 1.0 |
|                         | Delta   | 0.11 ± 0.3 |
|                         | P value | 0.04       |

---

**Table S2.** Baseline and stress echocardiographic indices in patients with and without CAD

| Variable                           |        | Patients<br>LAD -<br>(n=16) | Patients<br>LAD +<br>(n=17) | P<br>value | Patients<br>LCx-<br>(n=25) | Patient<br>LCx+<br>(n=8) | P<br>value | Patient<br>RCA-<br>(n=25) | Patient<br>RCA+<br>(n=8) | P<br>value |
|------------------------------------|--------|-----------------------------|-----------------------------|------------|----------------------------|--------------------------|------------|---------------------------|--------------------------|------------|
| <i>LV systolic function</i>        |        |                             |                             |            |                            |                          |            |                           |                          |            |
| LV EF (%)                          | Rest   | 42.3 ± 6.8                  | 30.2 ± 9.6                  | 0.02       | 38.7 ± 8.5                 | 30.1 ± 8.9               | 0.03       | 41.1 ± 9.3                | 31.5 ± 7.2               | 0.04       |
|                                    | Stress | 51.2 ± 10                   | 33.4 ± 10                   | <0.001     | 45.3 ± 11                  | 34.2 ± 10                | 0.01       | 49.6 ± 11                 | 37.4 ± 10                | 0.01       |
|                                    | Delta  | 8.9 ± 4.3                   | 3.2 ± 3.5                   | 0.005      | 6.7 ± 4.3                  | 4.1 ± 3.3                | 0.03       | 8.5 ± 4.6                 | 5.9 ± 4.2                | 0.02       |
|                                    | P      | <0.001                      | 0.03                        |            | 0.003                      | 0.02                     |            | <0.001                    | <0.001                   |            |
| Global PSS                         | Rest   | -11.4 ± 2.2                 | -9.10 ± 2.5                 | 0.02       | -10.9 ± 2.5                | -9.1 ± 2.4               | 0.04       | -11.6 ± 2.6               | -10.0 ± 1.8              | 0.07       |
|                                    | Stress | -14.3 ± 2.6                 | -10.0 ± 2.7                 | 0.001      | -13.0 ± 2.6                | -10.0 ± 2.5              | 0.01       | -13.9 ± 2.8               | -11.1 ± 2.7              | 0.01       |
|                                    | Delta  | -2.9 ± 0.9                  | -0.9 ± 1.1                  | 0.02       | -2.1 ± 1.2                 | -0.9 ± 1.1               | 0.04       | -2.30 ± 0.9               | -1.10 ± 1.2              | 0.04       |
|                                    | P      | 0.001                       | 0.04                        |            | 0.01                       | 0.03                     |            | 0.001                     | 0.001                    |            |
| Global SR                          | Rest   | -0.60 ± 0.2                 | -0.50 ± 0.2                 | 0.04       | -0.59 ± 0.2                | -0.37 ± 0.1              | 0.03       | -0.68 ± 0.2               | -0.51 ± 0.3              | 0.01       |
|                                    | Stress | -0.89 ± 0.3                 | -0.67 ± 0.2                 | 0.01       | -0.92 ± 0.2                | -0.51 ± 0.2              | 0.001      | -0.97 ± 0.2               | -0.65 ± 0.3              | 0.001      |
|                                    | Delta  | -0.29 ± 1.1                 | -0.17 ± 0.2                 | 0.02       | -0.33 ± 0.2                | -0.14 ± 0.2              | 0.02       | -0.29 ± 0.2               | -0.14 ± 0.2              | 0.01       |
|                                    | P      | 0.01                        | 0.02                        |            | 0.01                       | 0.03                     |            | 0.006                     | 0.03                     |            |
| <i>Territories supplied by LAD</i> |        |                             |                             |            |                            |                          |            |                           |                          |            |
| Longitudinal PSS                   | Rest   | -11.2 ± 2.2                 | -8.47 ± 2.5                 | 0.002      | -9.98 ± 2.7                | -9.14 ± 3.5              | 0.19       | -10.6 ± 2.9               | 9.62 ± 2.6               | 0.27       |
|                                    | Stress | -13.2 ± 3.1                 | -9.56 ± 3.1                 | 0.001      | -11.6 ± 3.4                | -10.0 ± 3.1              | 0.22       | -12.5 ± 3.4               | -10.9 ± 3.8              | 0.11       |
|                                    | Delta  | -1.73 ± 0.9                 | -1.0 ± 0.9                  | 0.01       | -1.62 ± 1.4                | -0.86 ± 0.9              | 0.05       | -1.9 ± 1.4                | -1.17 ± 1.6              | 0.33       |
|                                    | P      | 0.001                       | 0.001                       |            | 0.001                      | 0.01                     |            | 0.001                     | 0.001                    |            |
| Strain Rate                        | Rest   | -0.60 ± 0.3                 | -0.51 ± 0.6                 | 0.02       | -0.55 ± 0.3                | -0.49 ± 0.2              | 0.16       | -0.58 ± 0.2               | -0.61 ± 0.3              | 0.73       |
|                                    | Stress | -0.77 ± 0.3                 | -0.52 ± 0.4                 | 0.001      | -0.69 ± 0.3                | -0.60 ± 0.6              | 0.40       | -0.64 ± 0.4               | -0.69 ± 0.4              | 0.38       |
|                                    | Delta  | -0.17 ± 0.2                 | -0.02 ± 0.3                 | 0.01       | 0.14 ± 0.3                 | -0.11 ± 0.5              | 0.62       | -0.06 ± 0.4               | -0.08 ± 0.2              | 0.54       |
|                                    | P      | <0.001                      | 0.06                        |            | <0.001                     | 0.001                    |            | 0.04                      | 0.04                     |            |
| <i>Territories supplied by LCx</i> |        |                             |                             |            |                            |                          |            |                           |                          |            |
| Longitudinal PSS                   | Rest   | -11.6 ± 2.5                 | -10.1 ± 3.2                 | 0.08       | -11.5 ± 2.8                | -8.62 ± 2.9              | 0.01       | -12.2 ± 3.0               | -10.9 ± 2.1              | 0.12       |
|                                    | Stress | -13.5 ± 2.6                 | -12.1 ± 3.5                 | 0.04       | -13.8 ± 2.5                | -9.33 ± 3.2              | 0.001      | -14.0 ± 3.2               | -12.6 ± 2.5              | 0.09       |
|                                    | Delta  | -1.89 ± 1.1                 | -1.77 ± 1.1                 | 0.11       | -2.3 ± 1.1                 | -0.7 ± 0.3               | 0.01       | -1.80 ± 1.0               | -1.70 ± 1.1              | 0.36       |
|                                    | P      | <0.001                      | 0.001                       |            | <0.001                     | 0.04                     |            | <0.001                    | 0.001                    |            |

|                                           |        |             |             |       |             |             |       |             |             |       |
|-------------------------------------------|--------|-------------|-------------|-------|-------------|-------------|-------|-------------|-------------|-------|
| Strain rate                               | Rest   | -0.54 ± 0.2 | -0.48 ± 0.2 | 0.12  | -0.62 ± 0.3 | -0.41 ± 0.2 | 0.01  | -0.53 ± 0.3 | -0.62 ± 0.2 | 0.23  |
|                                           | Stress | -0.87 ± 0.3 | -0.77 ± 3.4 | 0.22  | -0.95 ± 0.2 | -0.51 ± 0.1 | 0.001 | -0.84 ± 0.3 | -0.89 ± 0.3 | 0.52  |
|                                           | Delta  | -0.33 ± 0.3 | -0.29 ± 0.3 | 0.09  | -0.31 ± 0.3 | -0.10 ± 0.4 | 0.01  | -0.31 ± 1.6 | -0.27 ± 0.9 | 0.31  |
|                                           | P      | 0.001       | 0.001       |       | <0.001      | 0.01        |       | 0.001       | 0.001       |       |
| <b><i>Territories supplied by RCA</i></b> |        |             |             |       |             |             |       |             |             |       |
| Longitudinal PSS                          | Rest   | -11.5 ± 3.4 | -9.9 ± 2.6  | 0.03  | -12.7 ± 3.2 | -11.7 ± 2.7 | 0.38  | -12.1 ± 3.3 | -9.71 ± 2.1 | 0.001 |
|                                           | Stress | -13.5 ± 3.3 | -11.1 ± 3.4 | 0.01  | -13.9 ± 3.4 | -12.9 ± 3.3 | 0.14  | -14.8 ± 0.3 | -10.1 ± 0.3 | 0.001 |
|                                           | Delta  | -2.4 ± 0.9  | -1.2 ± 1.1  | 0.004 | -1.21 ± 1.7 | -1.20 ± 1.6 | 0.78  | -2.70 ± 1.6 | -0.66 ± 0.9 | 0.01  |
|                                           | P      | 0.001       | 0.02        |       | 0.04        | 0.04        |       | 0.001       | 0.01        |       |
| Strain Rate                               | Rest   | -0.57 ± 0.3 | -0.51 ± 0.3 | 0.09  | -0.72 ± 0.3 | -0.71 ± 0.3 | 0.21  | -0.70 ± 0.2 | -0.56 ± 0.3 | 0.03  |
|                                           | Stress | -0.81 ± 0.4 | -0.75 ± 0.4 | 0.31  | -0.59 ± 0.3 | -0.79 ± 0.3 | 0.28  | -0.98 ± 0.3 | -0.61 ± 0.3 | 0.001 |
|                                           | Delta  | -0.24 ± 0.1 | -0.24 ± 0.2 | 0.44  | 0.13 ± 0.2  | -0.08 ± 0.2 | 0.07  | -0.26 ± 0.5 | -0.05 ± 0.2 | 0.01  |
|                                           | P      | 0.001       | 0.001       |       | 0.04        | 0.08        |       | 0.01        | 0.09        |       |
| <b><i>Wall motion score</i></b>           |        |             |             |       |             |             |       |             |             |       |
| Global WMSI                               | Rest   | 1.71 ± 0.4  | 1.98 ± 0.5  | 0.17  | 2.01 ± 0.5  | 2.28 ± 0.5  | 0.11  | 2.04 ± 0.5  | 2.21 ± 0.4  | 0.23  |
|                                           | Stress | 1.28 ± 0.4  | 1.83 ± 0.5  | 0.04  | 1.74 ± 0.5  | 2.07 ± 0.3  | 0.02  | 1.81 ± 0.5  | 1.80 ± 0.4  | 0.44  |
|                                           | Delta  | 0.43 ± 0.2  | -0.16 ± 0.2 | 0.13  | 0.27 ± 0.2  | 0.21 ± 0.2  | 0.36  | 0.27 ± 0.2  | 0.40 ± 0.2  | 0.06  |
|                                           | P      | 0.01        | 0.04        |       | 0.02        | 0.02        |       | 0.02        | 0.02        |       |
| WMSI supplied by LAD                      | Rest   | 1.84 ± 0.66 | 2.61 ± 0.3  | 0.001 | 2.24 ± 0.6  | 2.25 ± 0.5  | 0.32  | 2.26 ± 0.6  | 2.12 ± 0.7  | 0.29  |
|                                           | Stress | 1.51 ± 0.66 | 2.39 ± 0.3  | 0.001 | 2.00 ± 0.7  | 1.98 ± 0.7  | 0.19  | 1.98 ± 0.6  | 1.91 ± 0.8  | 0.49  |
|                                           | Delta  | 0.32 ± 0.2  | 0.22 ± 0.3  | 0.11  | 0.24 ± 0.3  | 0.27 ± 0.4  | 0.11  | 0.28 ± 0.2  | 0.21 ± 0.3  | 0.24  |
|                                           | P      | 0.01        | 0.02        |       | 0.03        | 0.04        |       | 0.01        | 0.01        |       |
| WMSI supplied by LCx                      | Rest   | 1.65 ± 0.46 | 1.75 ± 0.5  | 0.12  | 1.62 ± 0.5  | 1.95 ± 0.2  | 0.02  | 1.28 ± 0.4  | 1.17 ± 0.4  | 0.19  |
|                                           | Stress | 1.20 ± 0.3  | 1.32 ± 0.4  | 0.22  | 1.29 ± 0.4  | 1.43 ± 0.4  | 0.10  | 1.28 ± 0.4  | 1.16 ± 0.4  | 0.21  |
|                                           | Delta  | 0.44 ± 0.3  | 0.43 ± 0.4  | 0.61  | 0.37 ± 0.3  | 0.52 ± 0.3  | 0.04  | 0.38 ± 0.4  | 0.66 ± 0.5  | 0.04  |
|                                           | P      | 0.003       | 0.003       |       | 0.001       | <0.001      |       | 0.001       | <0.001      |       |
| WMSI supplied by RCA                      | Rest   | 2.23 ± 0.5  | 2.31 ± 0.8  | 0.45  | 2.16 ± 0.9  | 2.66 ± 0.7  | 0.08  | 2.16 ± 0.9  | 2.69 ± 0.5  | 0.03  |
|                                           | Stress | 2.17 ± 0.3  | 2.22 ± 0.7  | 0.33  | 2.01 ± 1.0  | 2.61 ± 0.8  |       | 2.18 ± 0.9  | 2.32 ± 1.0  | 0.11  |
|                                           | Delta  | 0.06 ± 0.3  | 0.09 ± 0.2  | 0.28  | 0.08 ± 0.3  | 0.04 ± 0.2  | 0.33  | 0.02 ± 0.2  | 0.37 ± 0.5  | 0.02  |
|                                           | P      | 0.22        | 0.31        |       | 0.03        |             |       | 0.12        | 0.001       |       |

Abbreviations: EF: Ejection fraction; PSS: Peak systolic strain; LAD: Left anterior descending artery; LCx: Left circumflex artery; RCA: Right coronary artery; WMSI: wall motion score index;

**Table S3.** Correlation of significant stenosis with echocardiographic indices

| <b>Variable</b>              | <b>R</b> | <b>P value</b> |
|------------------------------|----------|----------------|
| <b><i>LAD stenosis</i></b>   |          |                |
| Delta PSS (supplied by LAD)  | 0.51     | <0.001         |
| Delta SR (supplied by LAD)   | 0.60     | <0.001         |
| Delta WMSI (supplied by LAD) | 0.39     | 0.01           |
| Delta global PSS             | 0.43     | 0.02           |
| Delta global SR              | 0.52     | 0.001          |
| Delta EF                     | 0.50     | 0.001          |
| Delta global WMSI            | 0.44     | 0.02           |
| <b><i>LCx stenosis</i></b>   |          |                |
| Delta PSS (supplied by LCx)  | 0.49     | 0.001          |
| Delta SR (supplied by LCx)   | 0.55     | <0.001         |
| Delta WMSI (supplied by LCx) | 0.35     | 0.03           |
| Delta global PSS             | 0.46     | 0.02           |
| Delta global SR              | 0.49     | 0.01           |
| Delta EF                     | 0.51     | 0.01           |
| Delta global WMSI            | 0.37     | 0.04           |
| <b><i>RCA stenosis</i></b>   |          |                |
| Delta PSS (supplied by RCA)  | 0.43     | 0.01           |
| Delta SR (supplied by RCA)   | 0.56     | <0.001         |
| Delta WMSI (supplied by RCA) | 0.26     | 0.04           |
| Delta global PSS             | 0.40     | 0.02           |
| Delta global SR              | 0.45     | 0.01           |
| Delta EF                     | 0.47     | 0.01           |
| Delta global WMSI            | 0.30     | 0.03           |

*Abbreviation: EF: Ejection fraction; PSS: Peak systolic strain LAD: Left anterior descending artery; LCx: Left circumflex artery; RCA: Right coronary artery; WMSI: wall motion score index;*

**Table S4.** Echocardiographic predictors of culprit lesion

| Variable                         | Univariate predictors<br>OR (95% CI) | P<br>value | Multivariate predictors<br>OR (95% CI) | P<br>value |
|----------------------------------|--------------------------------------|------------|----------------------------------------|------------|
| <b>In predicting culprit LAD</b> |                                      |            |                                        |            |
| Delta PSS (supplied by LAD)      | 1.334 (1.161 to 3.315)               | 0.02       | 1.134 (1.059 to 3.315)                 | 0.024      |
| Delta SR (supplied by LAD)       | 1.806 (1.252 to 4.013)               | 0.001      | 1.566 (1.191 to 9.013)                 | 0.001      |
| Delta WMSI (supplied by LAD)     | 1.229 (0.637 to 9.101)               | 0.31       |                                        |            |
| <b>In predicting culprit LCx</b> |                                      |            |                                        |            |
| Delta PSS (supplied by LCx)      | 1.270 (1.329 to 4.205)               | 0.01       | 1.166 (1.029 to 4.205)                 | 0.038      |
| Delta SR (supplied by LCx)       | 1.808 (1.356 to 6.712)               | 0.001      | 1.911 (1.209 to 9.012)                 | 0.001      |
| Delta WMSI (supplied by LCx)     | 1.120 (1.081 to 9.111)               | 0.04       | 1.240 (0.709 to 6.018)                 | 0.391      |
| <b>In predicting culprit RCA</b> |                                      |            |                                        |            |
| Delta PSS (supplied by RCA)      | 1.690 (1.227 to 5.003)               | 0.01       | 1.450 (1.099 to 6.103)                 | 0.019      |
| Delta SR (supplied by RCA)       | 2.412 (1.656 to 9.097)               | 0.01       | 2.108 (1.613 to 5.133)                 | 0.012      |
| Delta WMSI (supplied by RCA)     | 1.120 (0.531 to 8.011)               | 0.29       |                                        |            |

*Abbreviation: LAD: Left anterior descending artery; LCx: Left circumflex artery; RCA: Right coronary artery; PSS: Peak systolic strain; SR; Strain rate; WMSI: wall motion score index;*
